# Supplementary material for: Overexpression of IL-15 promotes tumor destruction via NK1.1+ cells in a spontaneous breast cancer model
Source: Springer Nature journal article supplement (doi:10.1186/s12885-015-1264-3), 2015-04-14
Supplement: MOESM1 [file 9744312]

S1

MT

IL-15 TG/MT

A)

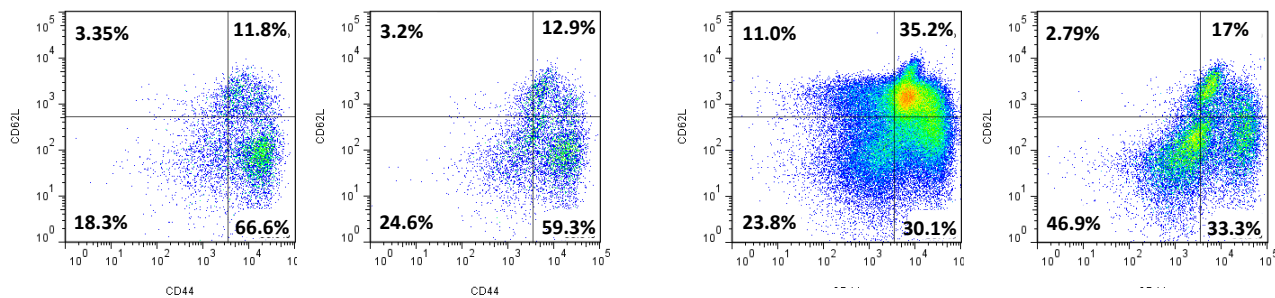

B)

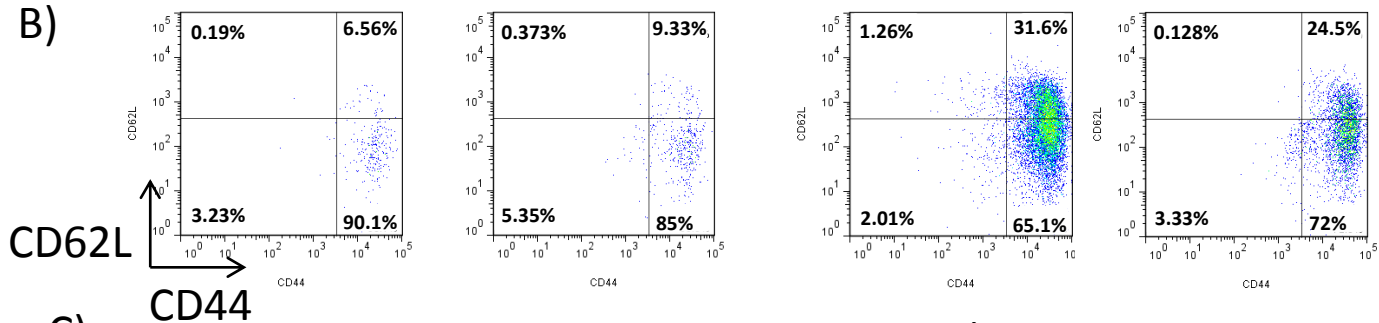

C)

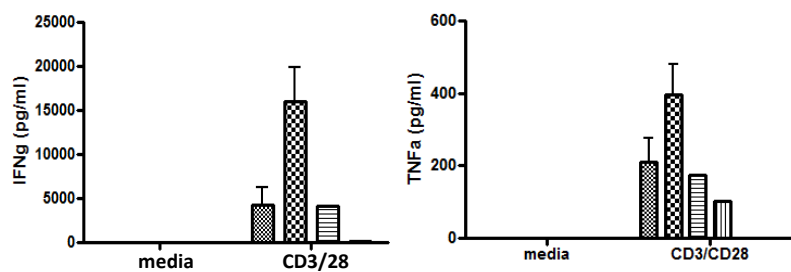

D)

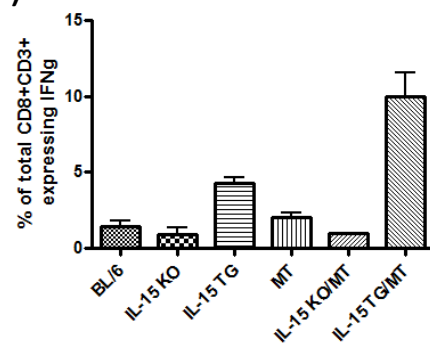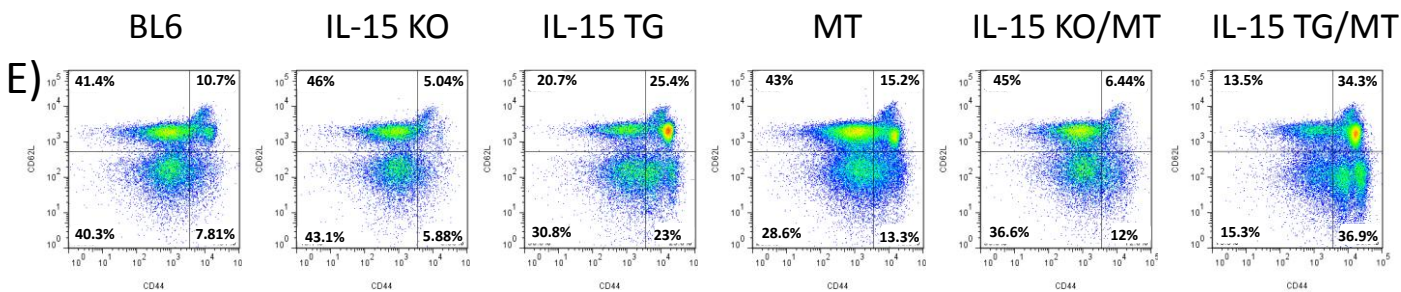

F)

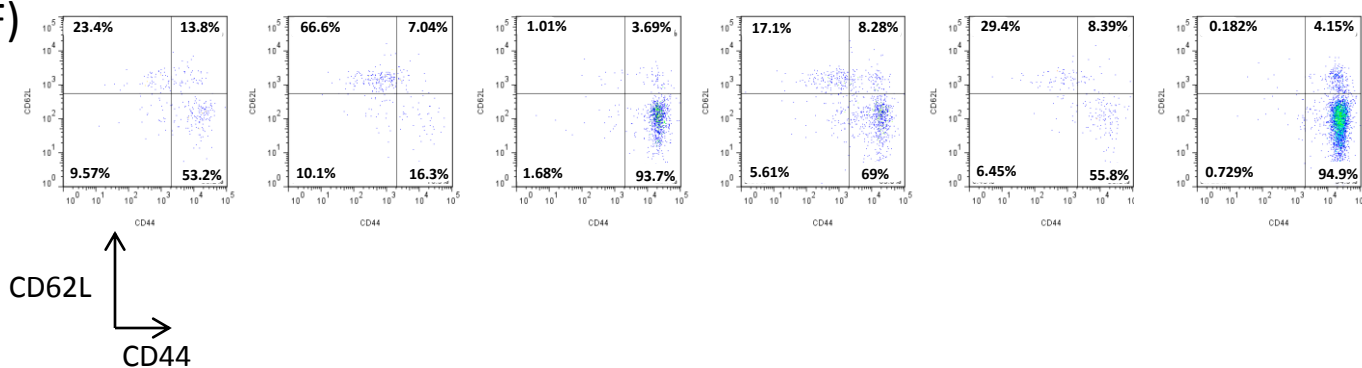

Supplemental Figure 1: IFN $\gamma$  production by CD8 T cells in the tumor and the spleen of IL-15 TG/MT and MT mice. (A & B) CD8 T cells were isolated by positive selection from tumors of mice and stimulated non-specifically. (A) After stimulation, IL-15 TG/MT CD8 T cells had a higher proportion of CD44<sup>+</sup>CD62L<sup>+</sup> (central memory) cells. (B) Of the CD8<sup>+</sup>CD3<sup>+</sup> T cells, it was the CD44<sup>+</sup>, both CD62L positive or negative, cells that were capable of producing IFN $\gamma$ . (n= 3/group) (C - F) CD8 T cells were isolated by positive selection from spleens of mice and stimulated non-specifically. (C) After 48 hours, supernatant IFN $\gamma$ /TNF $\alpha$  levels were highest in IL-15 TG/MT spleen CD8 cultures (n=3 MT and IL-15 TG/MT, n=1 BL/6 and IL-15 TG-representative of 3 experiments). In another set of experiments, after 12 hours of stimulation, Golgi Stop was added to determine which cells were capable of producing IFN $\gamma$  (D-F). (D) A higher proportion of IL-15 TG/MT splenic CD8<sup>+</sup>CD3<sup>+</sup> cells produced IFN $\gamma$  in comparison to MT CD8 T cells. (E) After stimulation, IL-15 TG/MT CD8 T cells had a higher proportion of CD44<sup>+</sup> CD62L<sup>-</sup> (effector/effector memory) and CD44<sup>+</sup>CD62L<sup>+</sup> (central memory) cells. (F) It is the CD44<sup>+</sup> cells that are capable of producing IFN $\gamma$  (D-F, n=3 MT and IL-15 TG/MT, n=2 BL/6, IL-15 KO, IL-15 TG, IL-15 KO/MT).

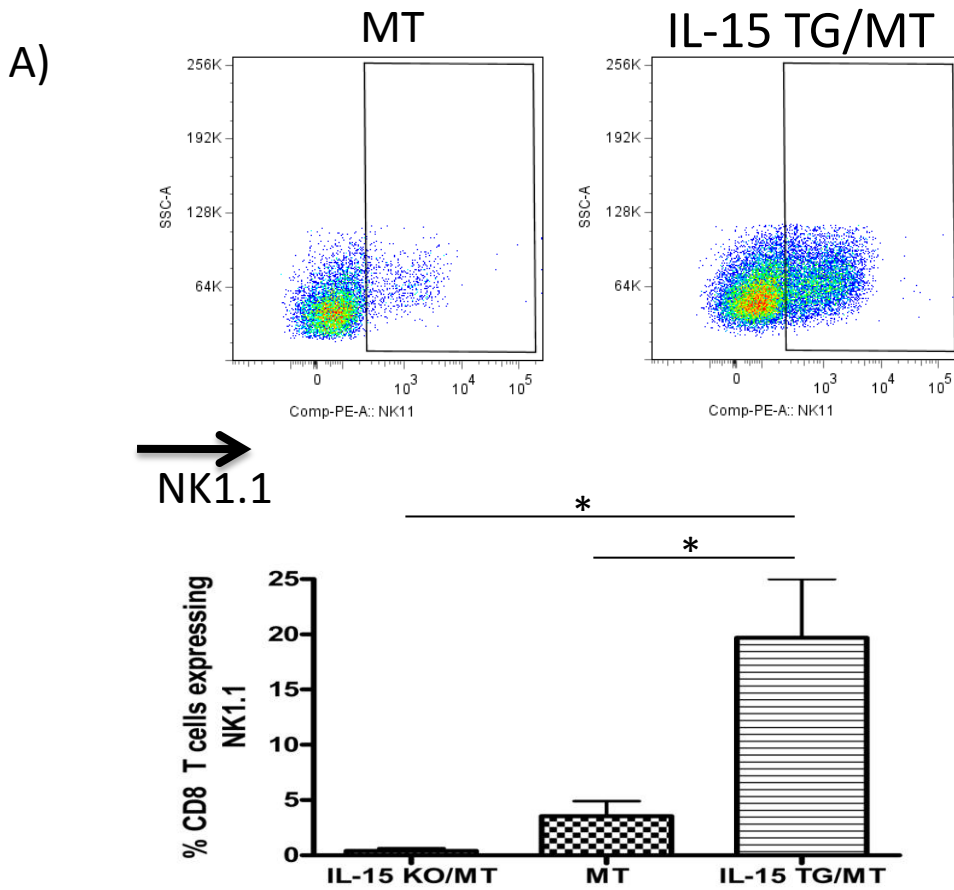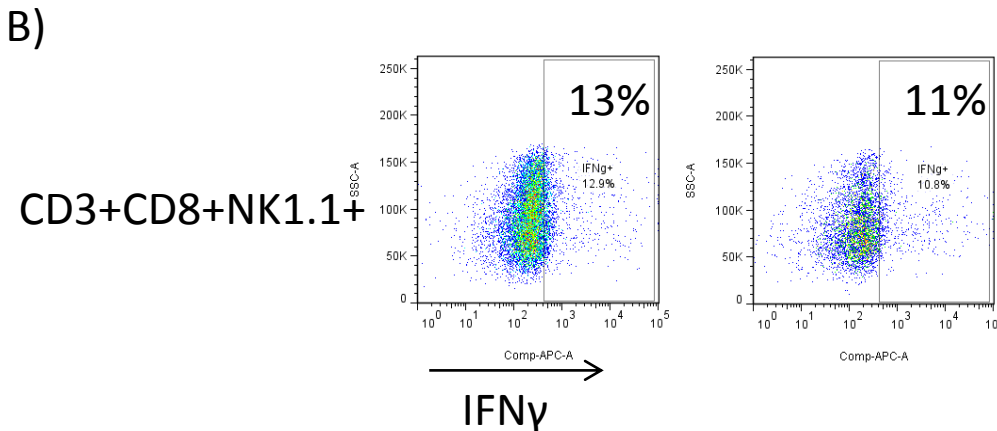

Supplemental Figure 2: IL-15 TG/MT tumors possess high levels of CD8+CD3+NK1.1+ T cells. (A) Tumors were digested and stained for CD45, CD8, CD3, and NK1.1 for flow cytometric analysis. IL-15 TG/MT tumors possessed high levels of unique CD8+CD3+NK1.1+ T cells (representative of 2 experiments, here n=2/group) (B) When CD8 T cells were isolated from IL-15 TG/MT tumors and stimulated non-specifically with CD3/CD28 antibodies in the presence of GolgiStop, 11-13% of these cells were found to produce IFN $\gamma$  (n=2). \*Statistically significant

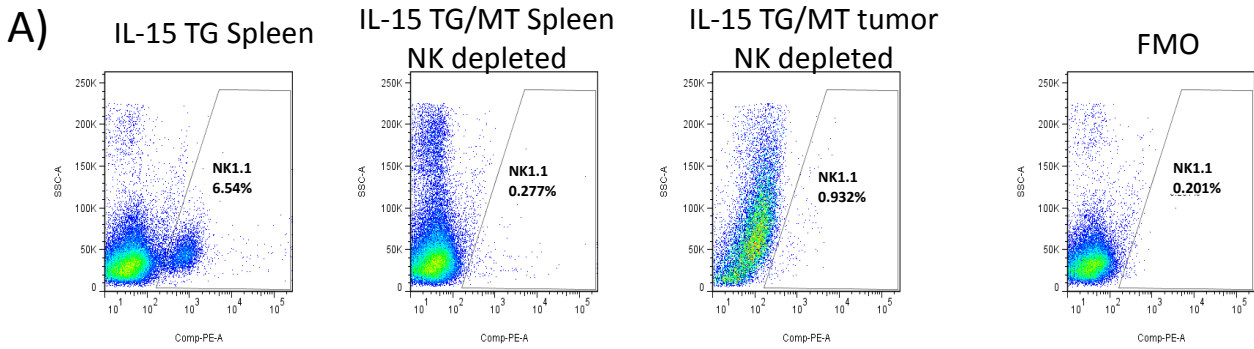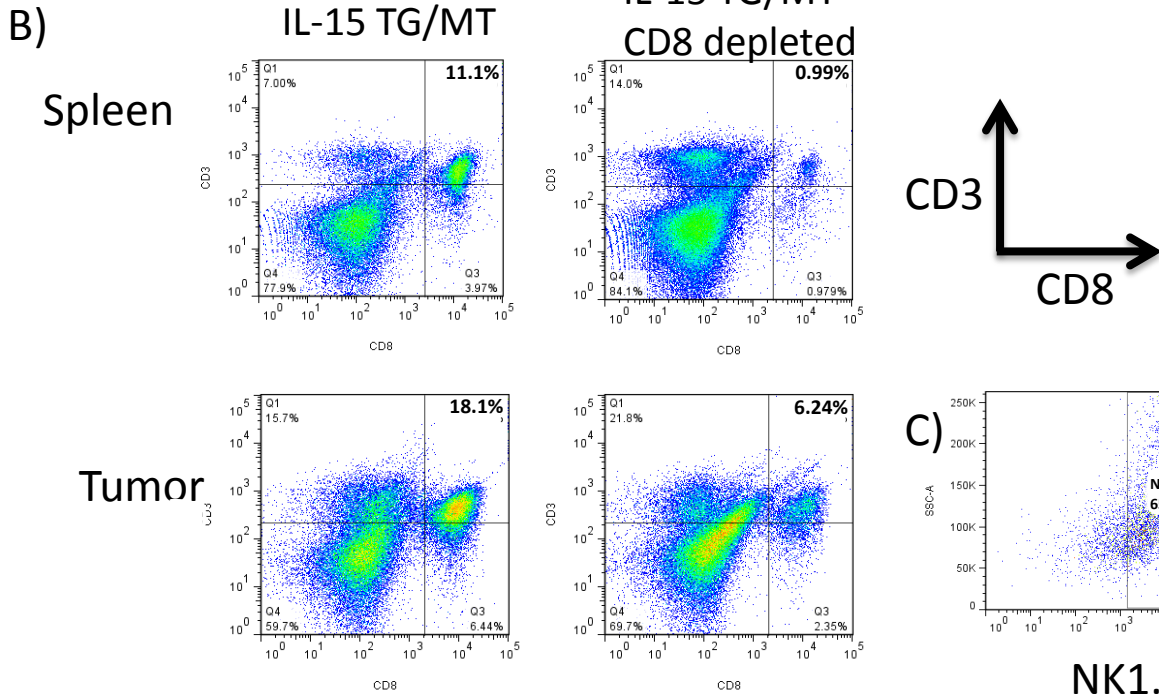

Supplemental Figure 3: IL-15 TG/MT mice were depleted with anti-NK1.1 (A) or anti-CD8 $\alpha$  (B/C) antibody long term starting at 4 weeks of age (representative flow plots from n=3 in each). (A) Long term depletion efficiently removed NK1.1 positive cells from both the spleen and tumor (FMO= fluorescence minus one). (B) Long term depletion efficiently removed CD8 positive cells from the spleen, but not completely in the tumor. (C) Of the CD8+CD3+ cells that remained in the tumor, the majority were NK1.1+.

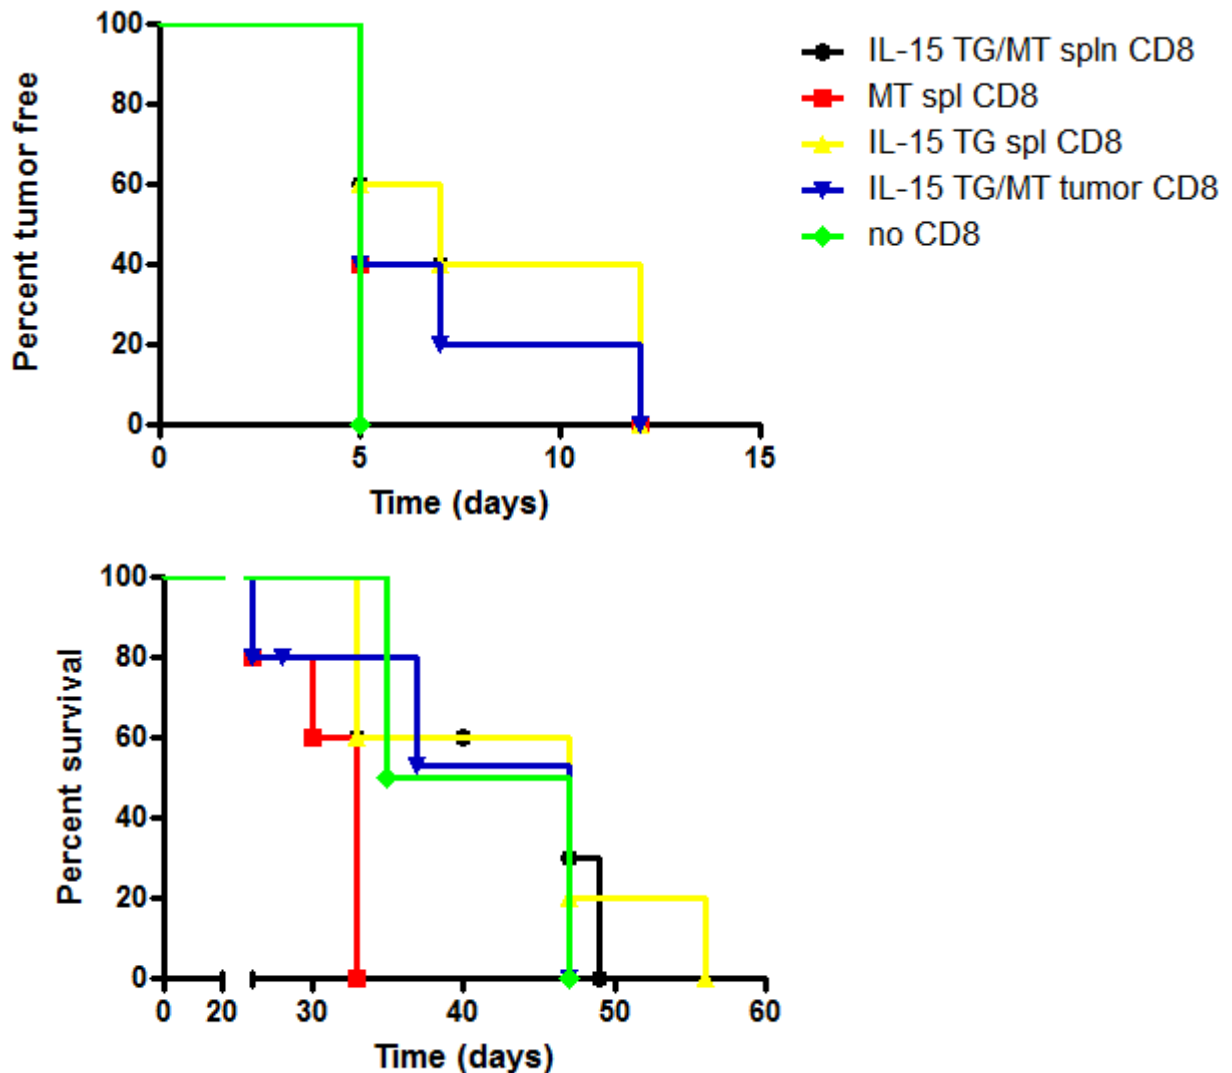

Supplemental Figure 4: Adoptive transfer of CD8 T cells from IL-15 TG/MT, MT or IL-15 TG does not protect from tumor formation. CD8 T cells were isolated from the spleens of IL-15 TG/MT, MT, IL-15 TG or tumors of IL-15 TG/MT mice.  $5 \times 10^6$  spleen CD8 T cells and  $1 \times 10^6$  tumor CD8 T cells were transferred into lymphopenic hosts. 24 hours later, mice were challenged with  $0.5 \times 10^6$  fresh primary MT cells subcutaneously. Resultant mice were followed for tumor formation (A) and endpoint (B). No statistically significant differences were found ( $n=5$  for all groups except those receiving no CD8,  $n=2$ ).
